# Supplementary material for: A Subset of PD-1-Expressing CD56bright NK Cells Identifies Patients with Good Response to Immune Checkpoint Inhibitors in Lung Cancer
Source: MDPI journal article supplement (doi:10.3390/cancers15020329), 2023-01-04
Supplement: s1 [file s1]

**Supplementary table S1. List of antibodies used for the phenotyping of immune cells**

| Antibody | Fluorophore    | Comercial brand | Reference   |
|----------|----------------|-----------------|-------------|
| CD16     | FITC           | Miltenyi        | 130-113-392 |
| GzmB     | PE             | Miltenyi        | 130-116-486 |
| CD56     | PerCP Vio700   | Miltenyi        | 130-114-551 |
| NKG2A    | PE-Vio770      | Miltenyi        | 130-113-567 |
| NKp46    | APC            | Miltenyi        | 130-092-609 |
| CD57     | APC-Vio 770    | Miltenyi        | 130-11-813  |
| NKG2D    | BV421          | BD              | 743558      |
| CD3      | VioGreen       | Miltenyi        | 130-113-134 |
| TIM3     | PE-Vio770      | Biologend       | 345014      |
| LAG3     | APC            | Miltenyi        | 130-105-453 |
| PD1      | Alexa Fluor700 | Biologend       | 329952      |
| CD8      | FITC           | Miltenyi        | 170-078-007 |
| FoxP3    | FITC           | Biologend       | 320106      |
| CD25     | APC            | Miltenyi        | 130-113-280 |
| CD4      | VioBlue        | Miltenyi        | 130-113-258 |
| CD27     | PE             | Miltenyi        | 130-113-630 |
| CD45RO   | PE-Vio770      | Miltenyi        | 130-113-551 |
| CCR7     | APC            | Miltenyi        | 130-108-286 |
